# Supplementary material for: Elucidating the structure of donor–acceptor conjugated polymer aggregates in liquid solution
Source: Royal Society of Chemistry journal article supplement (doi:10.1039/d3sm01458d), 2024-01-01
Supplement: d3sm01458d1.pdf [file d3sm01458d1.pdf]

# Elucidating Structure of Donor-acceptor Conjugated Polymer Aggregates in the Liquid Solution

Chinmoy Saha, Md Masrul Huda, Md Abdus Sabuj, and Neeraj Rai,\*

*Dave C. Swalm School of Chemical Engineering, and Center for Advanced Vehicular System, Mississippi State University,  
Mississippi State, MS-39762, USA.*

## Supplementary Information

**Table S1** Partial charge calculations for CPDT-BBT (Dimer) using various implicit solvents (octanol, chloroform, and chlorobenzene) and comparison of charges with octanol and other solvents.

| Atom No. | Octanol   | Chloro-benzene | Difference (Oct/ChlB) | Chloroform | Difference (Oct/ChlF) |
|----------|-----------|----------------|-----------------------|------------|-----------------------|
| 1        | 0.118914  | 0.117890       | 0.001024              | 0.117426   | 0.001488              |
| 2        | -0.107884 | -0.108105      | 0.000221              | -0.108200  | 0.000316              |
| 3        | 0.049029  | 0.049024       | 0.000005              | 0.049056   | -0.000027             |
| 4        | -0.033547 | -0.032735      | -0.000812             | -0.032372  | -0.001175             |
| 5        | -0.037594 | -0.036861      | -0.000733             | -0.036538  | -0.001056             |
| 6        | -0.112223 | -0.112033      | -0.000190             | -0.111947  | -0.000276             |
| 7        | 0.116046  | 0.115055       | 0.000991              | 0.114622   | 0.001424              |
| 8        | -0.022803 | -0.022178      | -0.000625             | -0.021899  | -0.000904             |
| 9        | -0.041149 | -0.040343      | -0.000806             | -0.040002  | -0.001147             |
| 10       | -0.015091 | -0.014153      | -0.000938             | -0.013749  | -0.001342             |
| 11       | 0.048140  | 0.046640       | 0.001500              | 0.045999   | 0.002141              |
| 12       | -0.018553 | -0.017786      | -0.000767             | -0.017453  | -0.001100             |
| 13       | -0.099375 | -0.098642      | -0.000733             | -0.098325  | -0.001050             |
| 14       | -0.013731 | -0.013397      | -0.000334             | -0.013260  | -0.000471             |
| 15       | -0.106060 | -0.105950      | -0.000110             | -0.105897  | -0.000163             |
| 16       | -0.015137 | -0.014770      | -0.000367             | -0.014611  | -0.000526             |
| 17       | -0.106395 | -0.105893      | -0.000502             | -0.105674  | -0.000721             |
| 18       | 0.101579  | 0.101634       | -0.000055             | 0.101652   | -0.000073             |
| 19       | 0.038098  | 0.036991       | 0.001107              | 0.036508   | 0.001590              |
| 20       | 0.100839  | 0.099968       | 0.000871              | 0.099591   | 0.001248              |
| 21       | 0.050601  | 0.049567       | 0.001034              | 0.049107   | 0.001494              |
| 22       | 0.101815  | 0.101133       | 0.000682              | 0.100832   | 0.000983              |
| 23       | 0.100740  | 0.101108       | -0.000368             | 0.101246   | -0.000506             |
| 24       | -0.104520 | -0.103535      | -0.000985             | -0.103127  | -0.001393             |
| 25       | -0.028304 | -0.027714      | -0.000590             | -0.027455  | -0.000849             |
| 26       | 0.048514  | 0.049649       | -0.001135             | 0.050195   | -0.001681             |
| 27       | -0.003610 | -0.003270      | -0.000340             | -0.003134  | -0.000476             |
| 28       | 0.103570  | 0.103520       | 0.000050              | 0.103500   | 0.000070              |
| 29       | -0.337185 | -0.336398      | -0.000787             | -0.336051  | -0.001134             |
| 30       | 0.461909  | 0.458364       | 0.003545              | 0.456757   | 0.005152              |
| 31       | -0.333331 | -0.333286      | -0.000045             | -0.333247  | -0.000084             |
| 32       | 0.108876  | 0.108838       | 0.000038              | 0.108820   | 0.000056              |
| 33       | -0.011266 | -0.011001      | -0.000265             | -0.010872  | -0.000394             |
| 34       | 0.104210  | 0.104165       | 0.000045              | 0.104145   | 0.000065              |
| 35       | -0.338877 | -0.338167      | -0.000710             | -0.337834  | -0.001043             |
| 36       | 0.465399  | 0.461970       | 0.003429              | 0.460428   | 0.004971              |
| 37       | -0.323297 | -0.322972      | -0.000325             | -0.322861  | -0.000436             |
| 38       | 0.108702  | 0.108633       | 0.000069              | 0.108599   | 0.000103              |
| 39       | -0.022043 | -0.021408      | -0.000635             | -0.021133  | -0.000910             |
| 40       | 0.048939  | 0.050210       | -0.001271             | 0.050812   | -0.001873             |
| 41       | -0.028970 | -0.028363      | -0.000607             | -0.028084  | -0.000886             |
| 42       | -0.037243 | -0.036544      | -0.000699             | -0.036237  | -0.001006             |
| 43       | -0.107830 | -0.107248      | -0.000582             | -0.106979  | -0.000851             |
| 44       | 0.105249  | 0.104966       | 0.000283              | 0.104849   | 0.000400              |
| 45       | -0.021370 | -0.020604      | -0.000766             | -0.020265  | -0.001105             |
| 46       | -0.037230 | -0.036521      | -0.000709             | -0.036218  | -0.001012             |

**Table S1** Partial charge calculations for CPDT-BBT (Dimer) using various implicit solvents (octanol, chloroform, and chlorobenzene) and comparison of charges with octanol and other solvents.

| Atom No. | Octanol   | Chloro-benzene | Difference (Oct/ChlB) | Chloroform | Difference (Oct/ChlF) |
|----------|-----------|----------------|-----------------------|------------|-----------------------|
| 47       | -0.014654 | -0.013760      | -0.000894             | -0.013367  | -0.001287             |
| 48       | 0.050572  | 0.049148       | 0.001424              | 0.048514   | 0.002058              |
| 49       | -0.018660 | -0.017871      | -0.000789             | -0.017528  | -0.001132             |
| 50       | -0.106033 | -0.105553      | -0.000480             | -0.105345  | -0.000688             |
| 51       | -0.014980 | -0.014644      | -0.000336             | -0.014501  | -0.000479             |
| 52       | -0.105755 | -0.105698      | -0.000057             | -0.105668  | -0.000087             |
| 53       | -0.013750 | -0.013431      | -0.000319             | -0.013293  | -0.000457             |
| 54       | -0.099364 | -0.098658      | -0.000706             | -0.098353  | -0.001011             |
| 55       | 0.102086  | 0.101407       | 0.000679              | 0.101104   | 0.000982              |
| 56       | 0.050916  | 0.049829       | 0.001087              | 0.049338   | 0.001578              |
| 57       | 0.100997  | 0.100089       | 0.000908              | 0.099693   | 0.001304              |
| 58       | 0.037764  | 0.036564       | 0.001200              | 0.036035   | 0.001729              |
| 59       | 0.101681  | 0.101699       | -0.000018             | 0.101702   | -0.000021             |
| 60       | 0.101393  | 0.101764       | -0.000371             | 0.101908   | -0.000515             |
| 61       | -0.102840 | -0.101817      | -0.001023             | -0.101389  | -0.001451             |
| 62       | -0.026500 | -0.026101      | -0.000399             | -0.025921  | -0.000579             |
| 63       | 0.052918  | 0.054083       | -0.001165             | 0.054641   | -0.001723             |
| 64       | 0.002954  | 0.003622       | -0.000668             | 0.003908   | -0.000954             |
| 65       | 0.107297  | 0.107164       | 0.000133              | 0.107107   | 0.000190              |
| 66       | -0.325906 | -0.325528      | -0.000378             | -0.325390  | -0.000516             |
| 67       | 0.460965  | 0.457336       | 0.003629              | 0.455719   | 0.005246              |
| 68       | -0.357426 | -0.356534      | -0.000892             | -0.356091  | -0.001335             |
| 69       | 0.101293  | 0.101244       | 0.000049              | 0.101231   | 0.000062              |
| 70       | -0.092910 | -0.093272      | 0.000362              | -0.093408  | 0.000498              |
| 71       | 0.101009  | 0.100963       | 0.000046              | 0.100953   | 0.000056              |
| 72       | -0.357633 | -0.356776      | -0.000857             | -0.356352  | -0.001281             |
| 73       | 0.460307  | 0.457203       | 0.003104              | 0.455789   | 0.004518              |
| 74       | -0.340094 | -0.339314      | -0.000780             | -0.338972  | -0.001122             |
| 75       | 0.101494  | 0.101362       | 0.000132              | 0.101308   | 0.000186              |
| 76       | 0.126308  | 0.126032       | 0.000276              | 0.125908   | 0.000400              |

**Table S2** Radius of gyration ( $R_g$ ) of oligomers and their correlation length ( $\xi$ ) compared to the corresponding (cubic) simulation box length. Here, the largest  $R_g$  value of the oligomers is reported for each system.

| $T = 298 \text{ K}$      |            |                                                            |                            |
|--------------------------|------------|------------------------------------------------------------|----------------------------|
| Chain length, $n$        | $R_g$ (nm) | Correlation length, $\xi$ (nm)<br>when $R_g = \sqrt{3}\xi$ | Simulation box length (nm) |
| Dimer ( $n = 2$ )        | 6.66       | 3.84                                                       | 10.99                      |
| Tetramer ( $n = 4$ )     | 8.35       | 4.82                                                       | 13.80                      |
| Octamer ( $n = 8$ )      | 10.16      | 5.87                                                       | 17.38                      |
| Hexadecamer ( $n = 16$ ) | 13.57      | 7.84                                                       | 21.89                      |

| $T = 323 \text{ K}$      |            |                                                          |                            |
|--------------------------|------------|----------------------------------------------------------|----------------------------|
| Chain length, $n$        | $R_g$ (nm) | Correlation length, $\xi$ (nm)<br>if $R_g = \sqrt{3}\xi$ | Simulation box length (nm) |
| Dimer ( $n = 2$ )        | 7.82       | 4.53                                                     | 11.10                      |
| Tetramer ( $n = 4$ )     | 7.08       | 4.09                                                     | 13.92                      |
| Octamer ( $n = 8$ )      | 8.40       | 4.85                                                     | 17.54                      |
| Hexadecamer ( $n = 16$ ) | 12.50      | 7.22                                                     | 22.08                      |

(A)

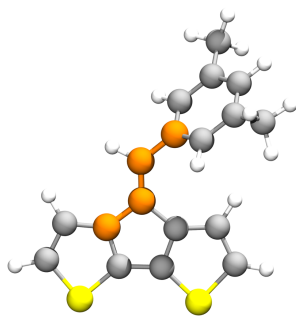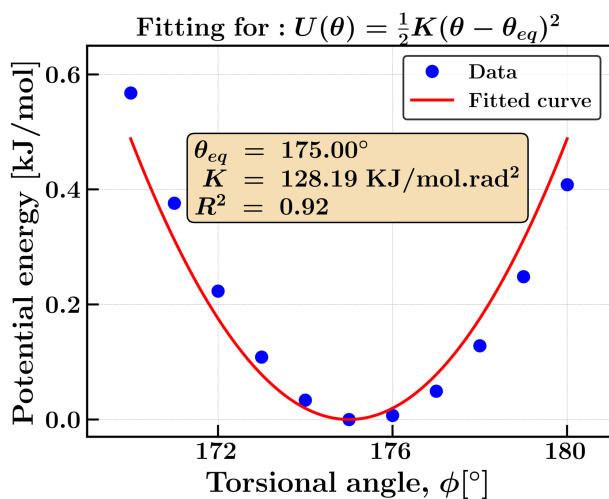

(B)

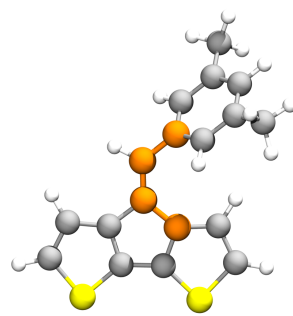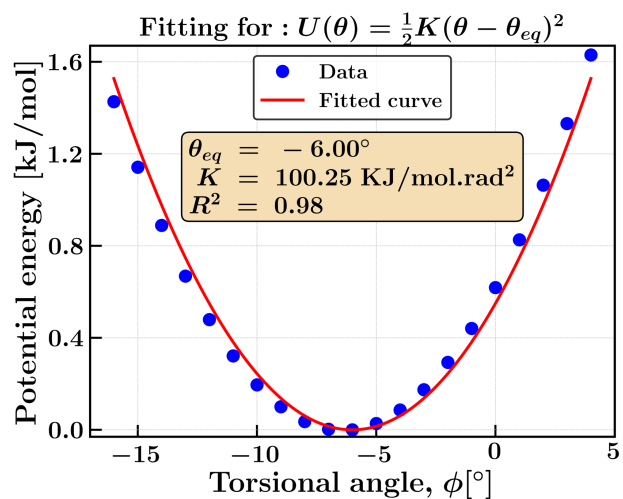

(C)

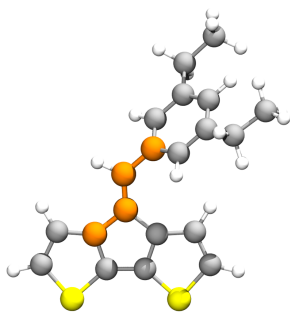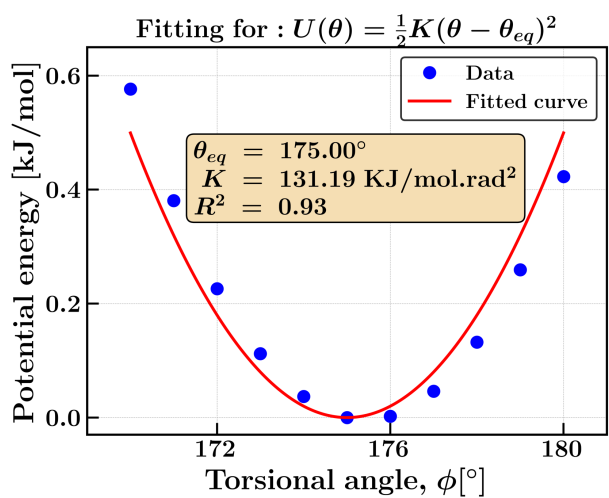

(D)

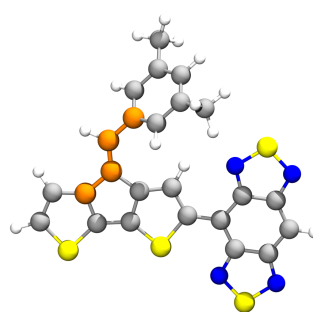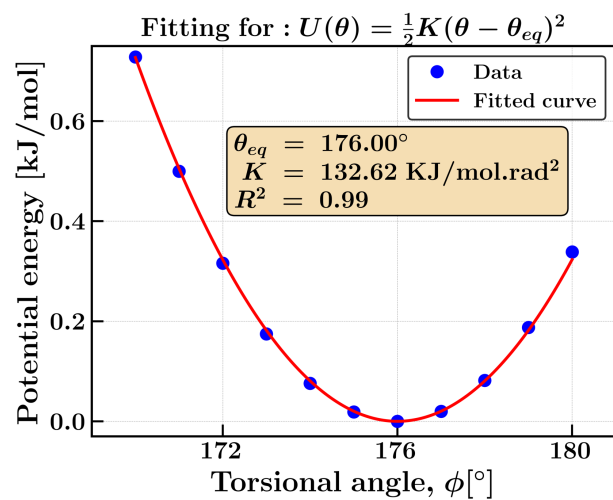

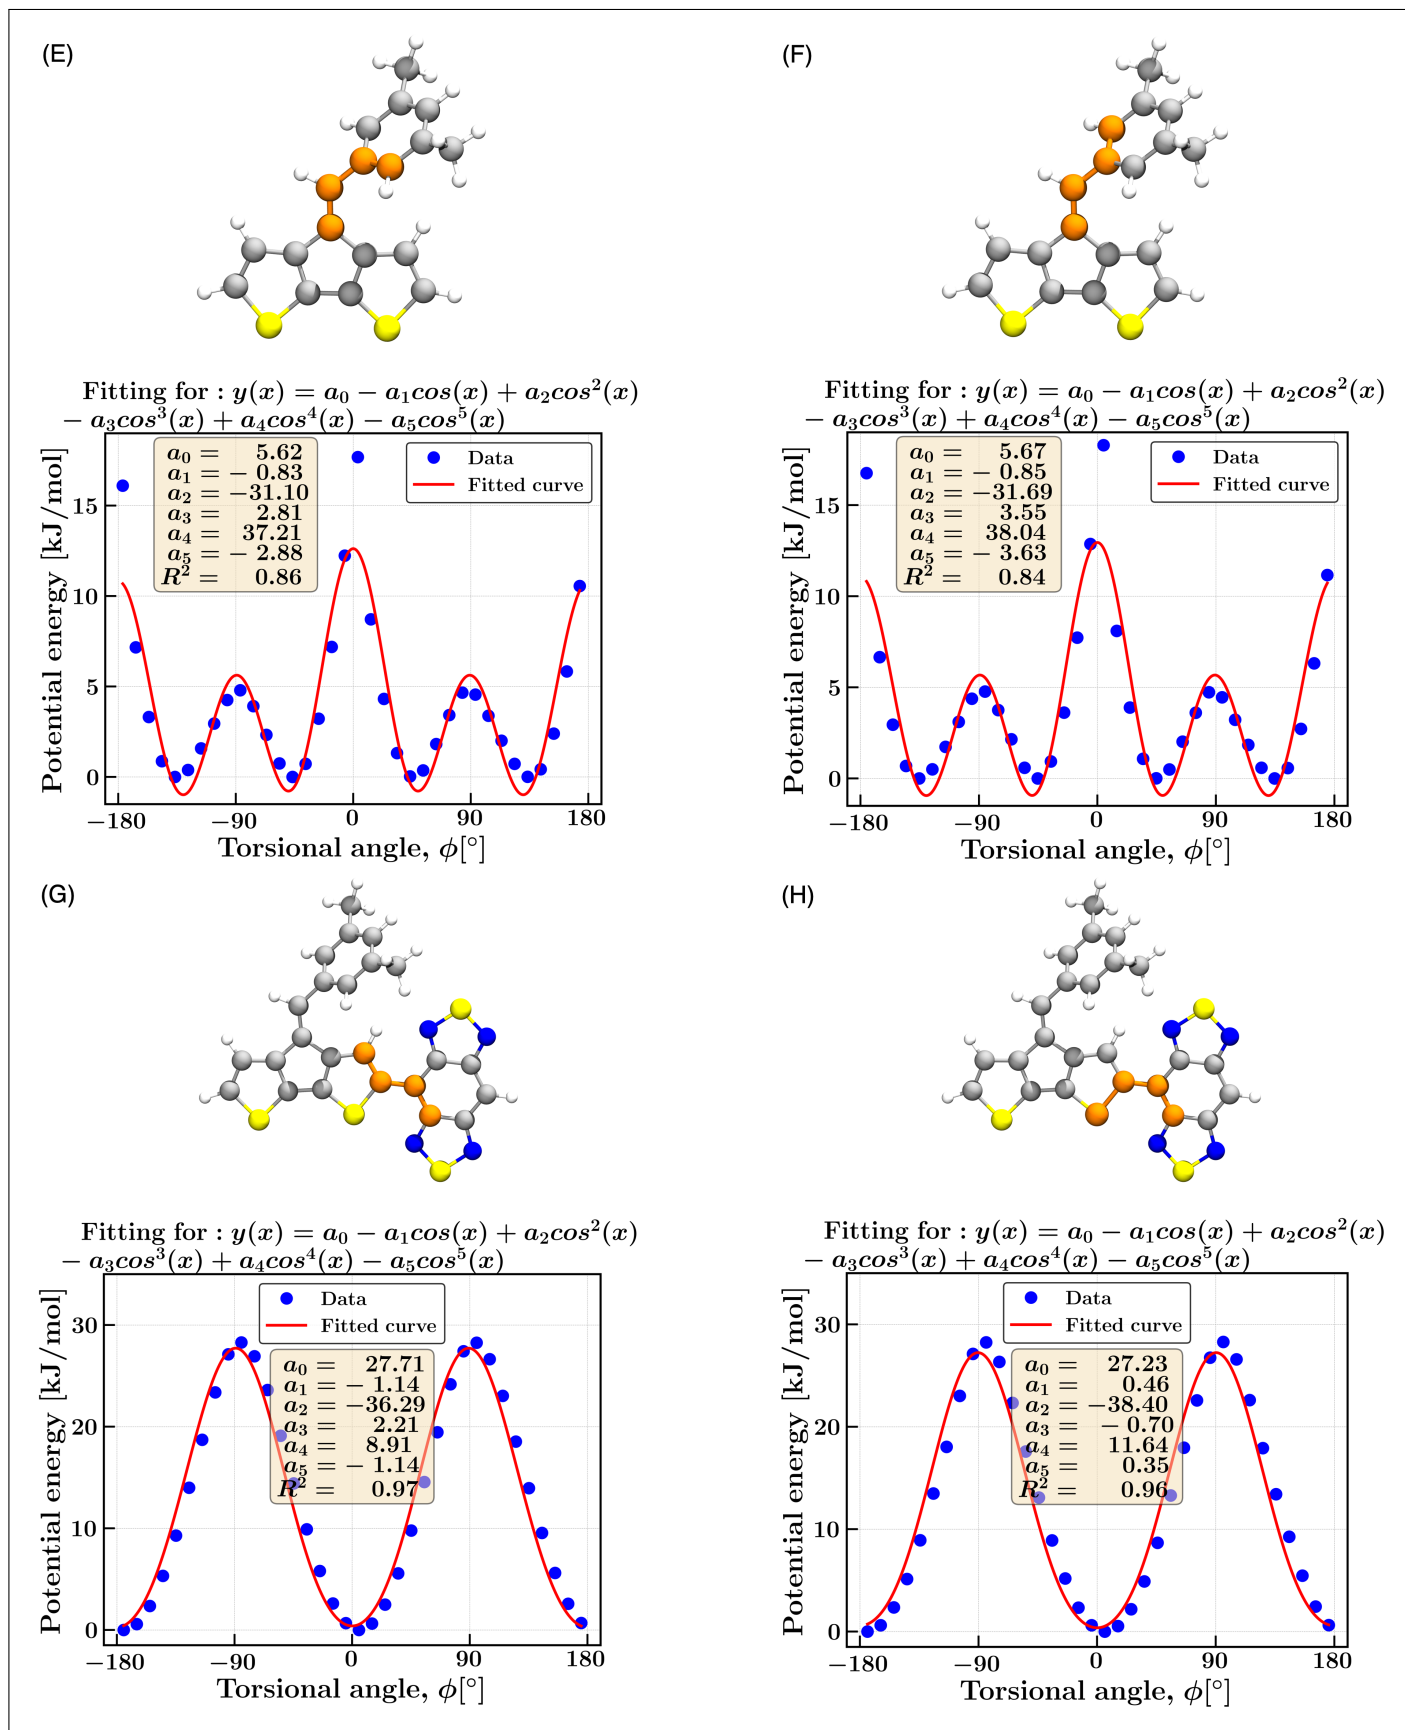

**Fig. S1** Potential energy surface scanning was performed for the dihedral angle indicated by the orange colored atoms. The scanning was conducted in two different ways: rigid scanning (A-D) and regular scanning (E-H). The obtained data from the scanning was fitted using two different equations: the Improper potential equation for the rigid scanning (A-D) and the Ryckaert-Bellemans potential equation for the regular scanning (E-H).

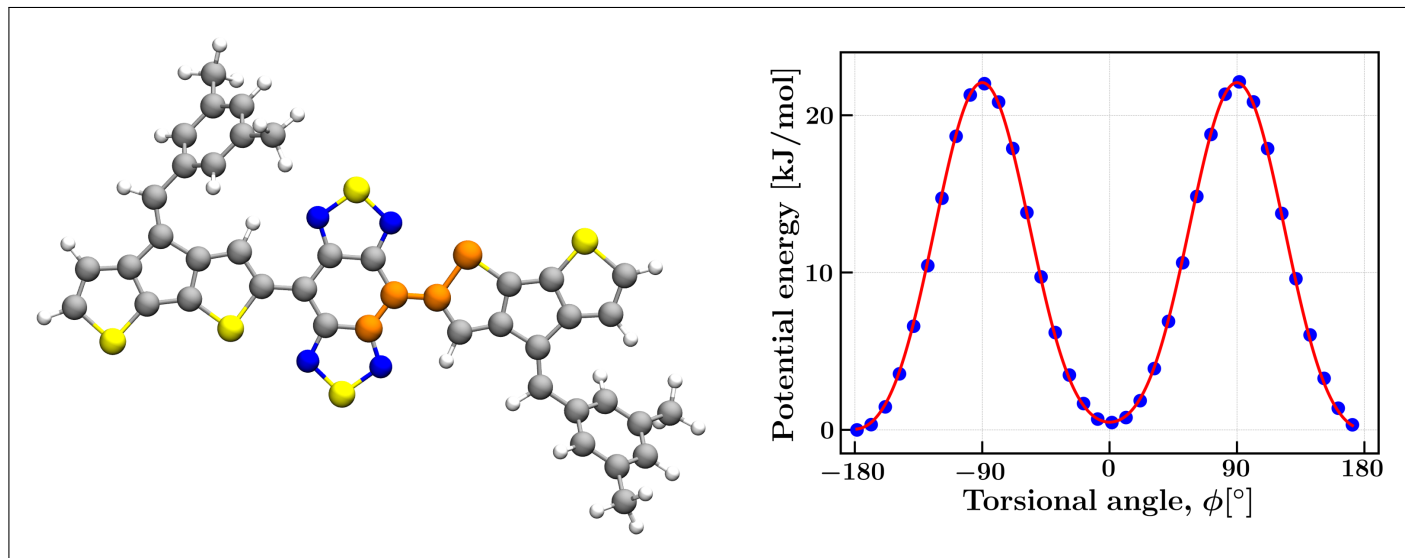

**Fig. S2** Energy plot in the figure depicts the energy variation of the cis and trans configurations of the CPDT-BBT repeating unit in the oligomers, with the dihedral angle represented by the orange colored atoms.

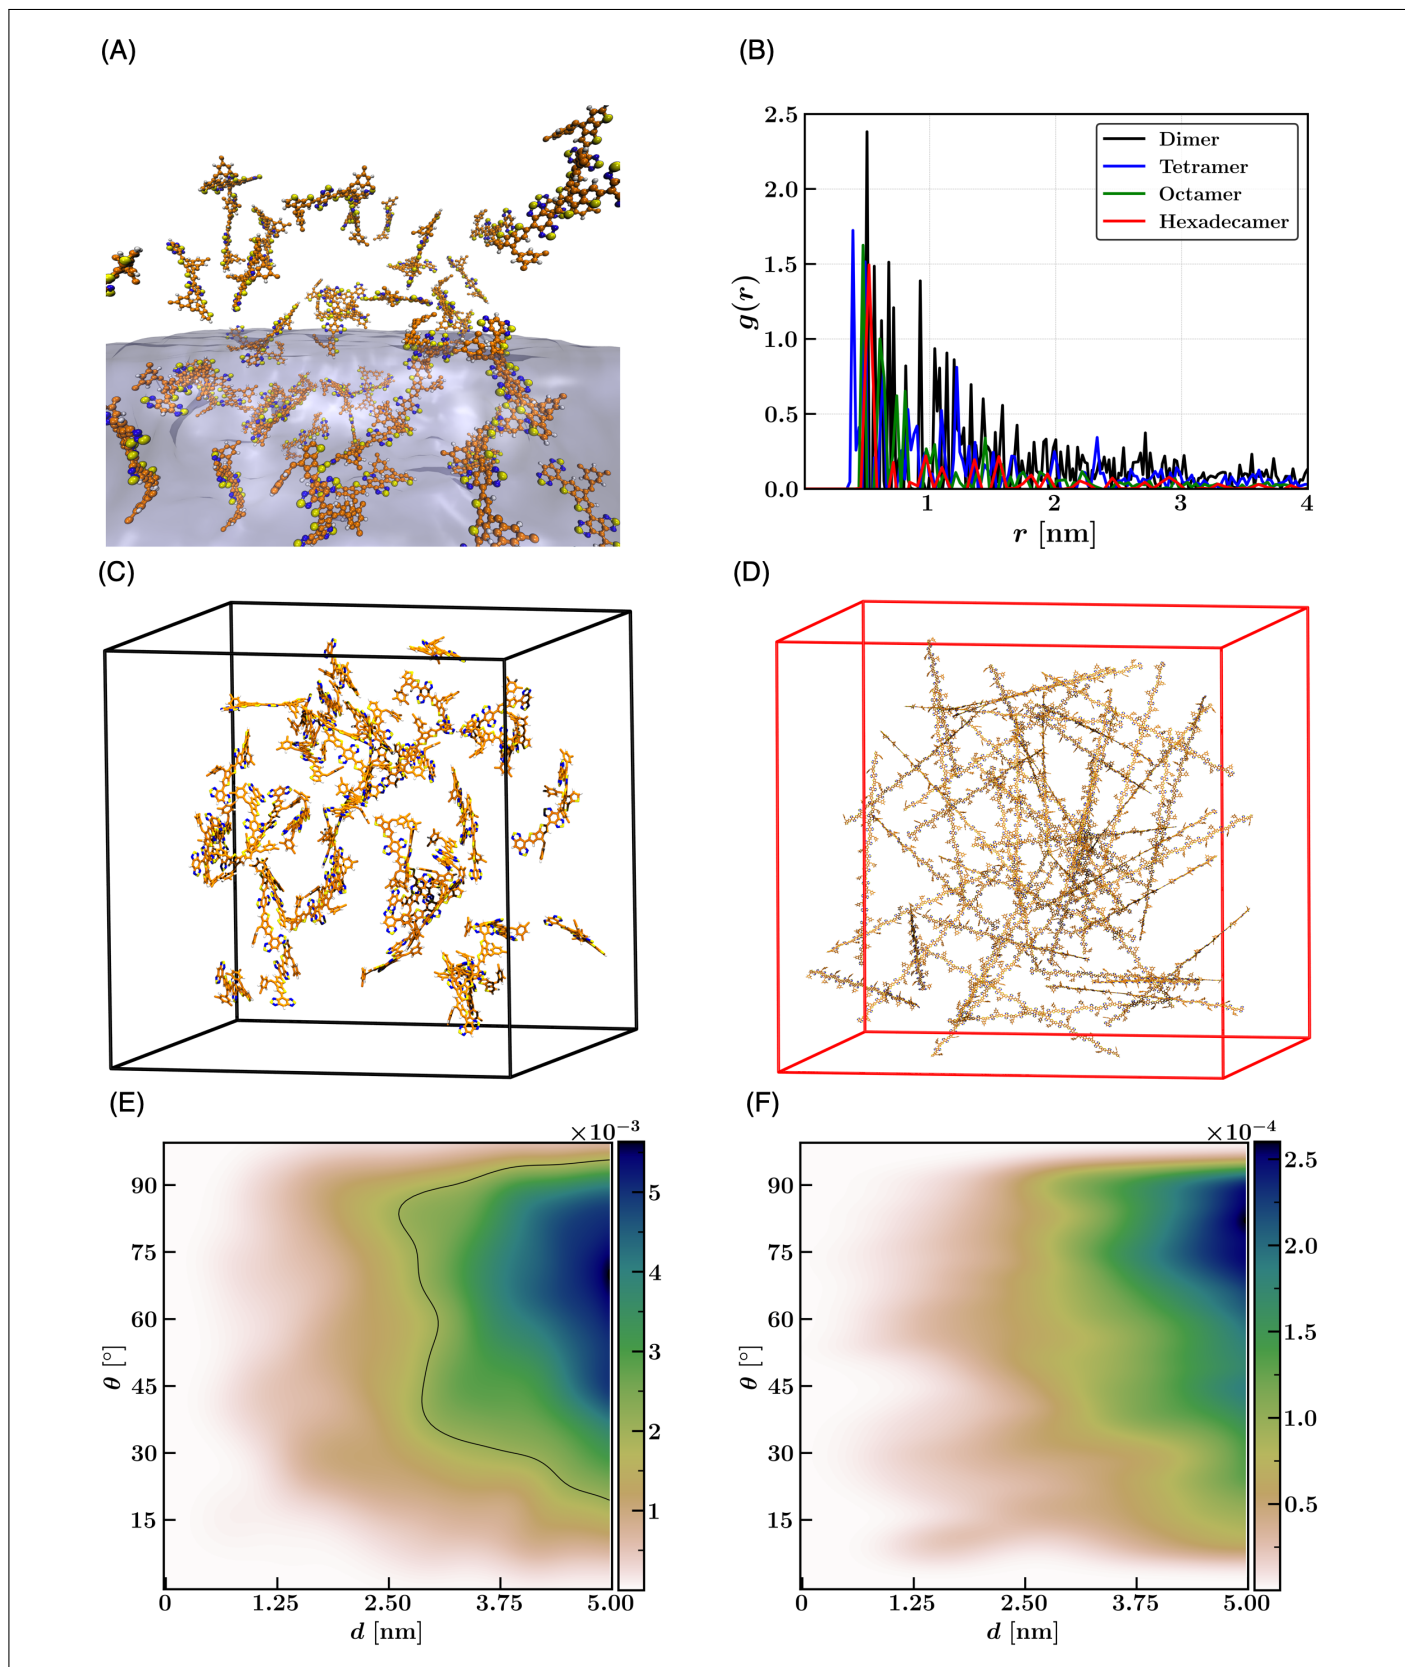

**Fig. S3** (A) Snapshot of molecular dynamics simulation (initial) system of CPDT-BBT ( $n = 2$ ) and the box is shown half-filled for better visualization. (B) Inter-chain RDFs ( $g(r)$ ) of the aromatic ring-center along the CPDT-BBT backbone. Initial packing of CPDT-BBT for  $n = 2$  and  $n = 16$  are shown in (C) and (D), respectively, without chloroform solvent. The probability (density) map of angle ( $\theta$ ) between stacked aromatic ring (plane) with respect to the distance ( $d$ ) between these rings for  $n = 2$  (E) and  $n = 16$  (F).



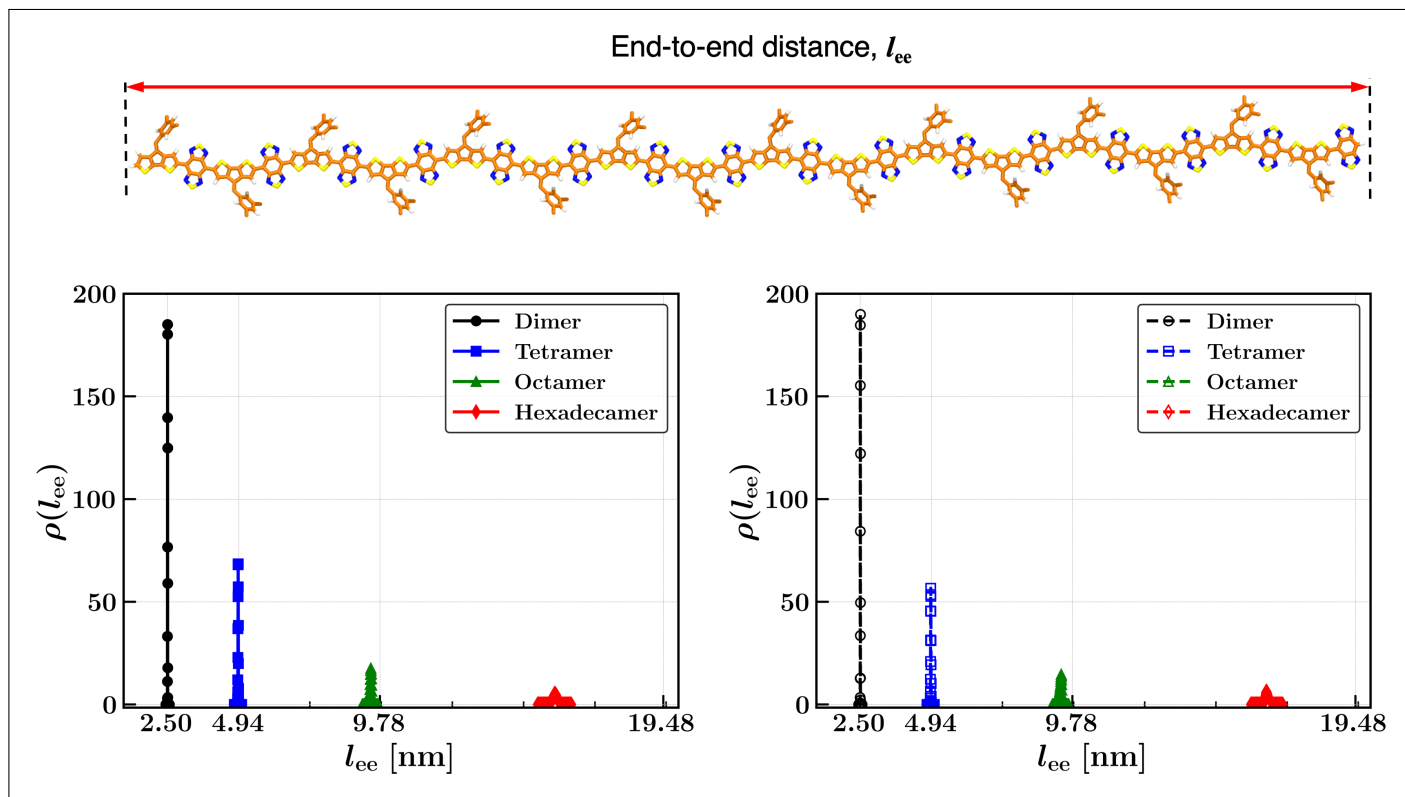

Fig. S4 End-to-end (E2E) distance distribution ( $\rho(l_{ee})$ ) of CPDT-BBT oligomers as a function of E2E distance,  $l_{ee}$ . Isolated single chain extended length is shown as x-axis scale points in the figure. Filled (left) and unfilled (right) markers are for  $T = 298$  and  $323$  K, respectively.

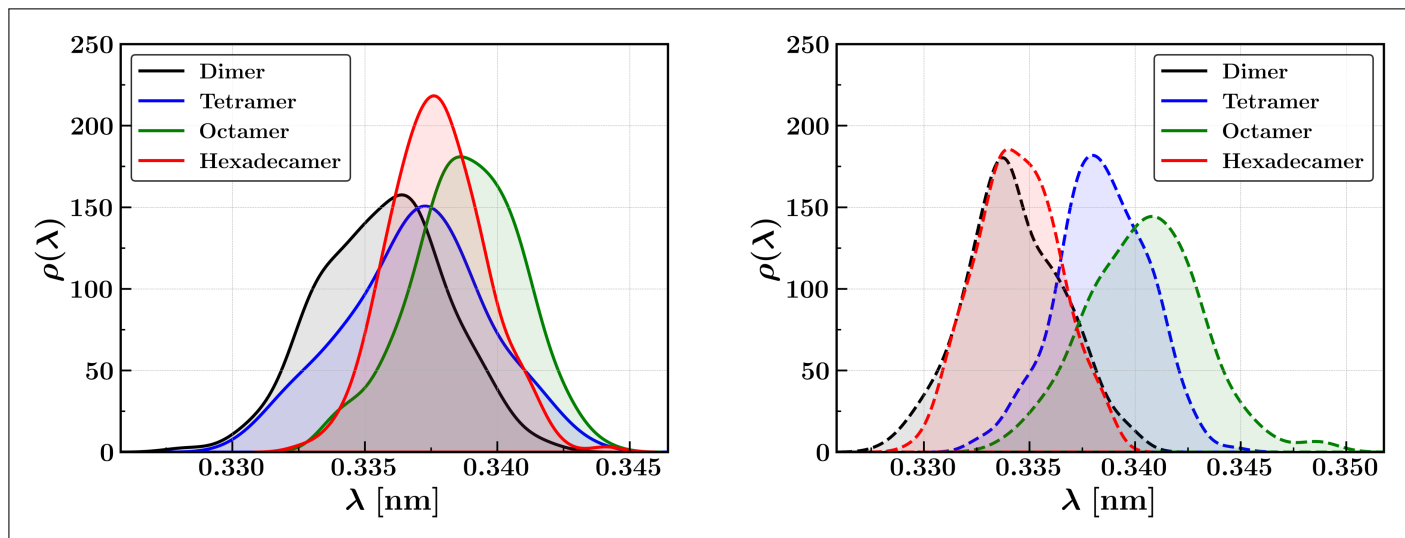

Fig. S5  $\pi$ - $\pi$  stacking distribution of CPDT-BBT oligomers in chloroform solvent at temperature  $T = 298$  K (left) and  $T = 323$  K (right).

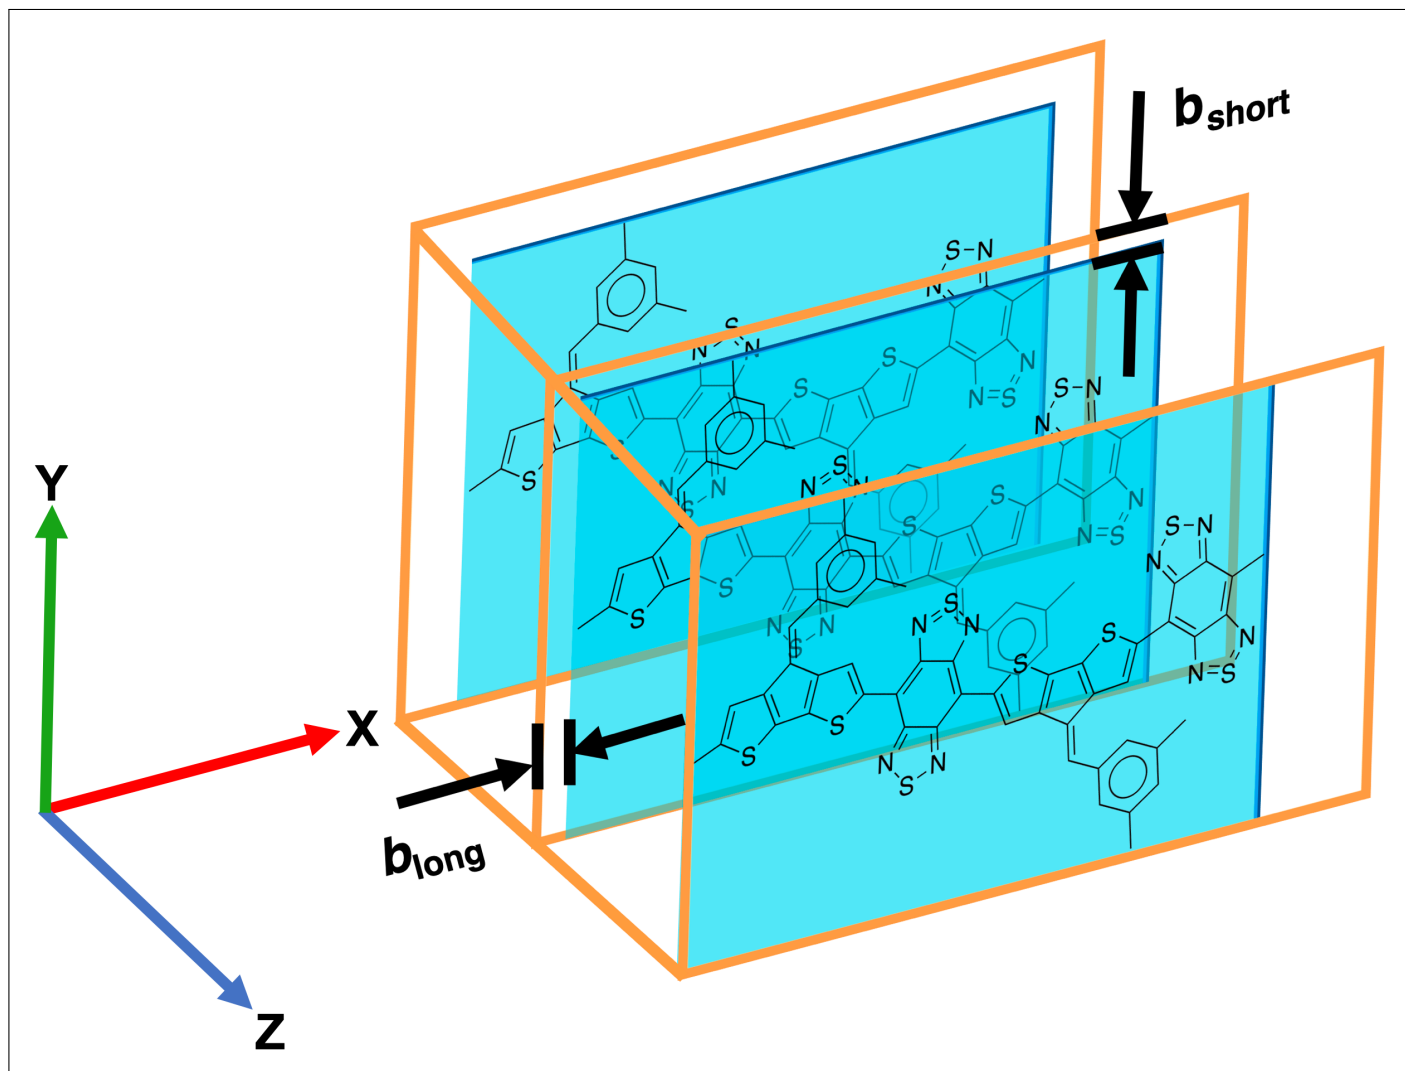

Fig. S6 Schematic of displacement between two neighboring  $\pi$ -stacked CPDT-BBT oligomers in chloroform.

Table S3 Displacement distances of different oligomers at two different temperatures, where  $b_{long}$  and  $b_{short}$  represent long and short displacements, respectively.

| Chain length, $n$        | $T = 298 \text{ K}$     |                          | $T = 323 \text{ K}$     |                          |
|--------------------------|-------------------------|--------------------------|-------------------------|--------------------------|
|                          | $b_{long} [\text{\AA}]$ | $b_{short} [\text{\AA}]$ | $b_{long} [\text{\AA}]$ | $b_{short} [\text{\AA}]$ |
| Dimer ( $n = 2$ )        | $1.793 \pm 0.010$       | $1.010 \pm 0.008$        | $1.812 \pm 0.010$       | $0.981 \pm 0.008$        |
| Tetramer ( $n = 4$ )     | $1.917 \pm 0.024$       | $1.155 \pm 0.017$        | $1.802 \pm 0.021$       | $0.963 \pm 0.015$        |
| Octamer ( $n = 8$ )      | $2.122 \pm 0.020$       | $0.702 \pm 0.021$        | $1.819 \pm 0.157$       | $1.192 \pm 0.077$        |
| Hexadecamer ( $n = 16$ ) | $2.038 \pm 0.026$       | $1.228 \pm 0.029$        | $1.768 \pm 0.042$       | $1.060 \pm 0.027$        |

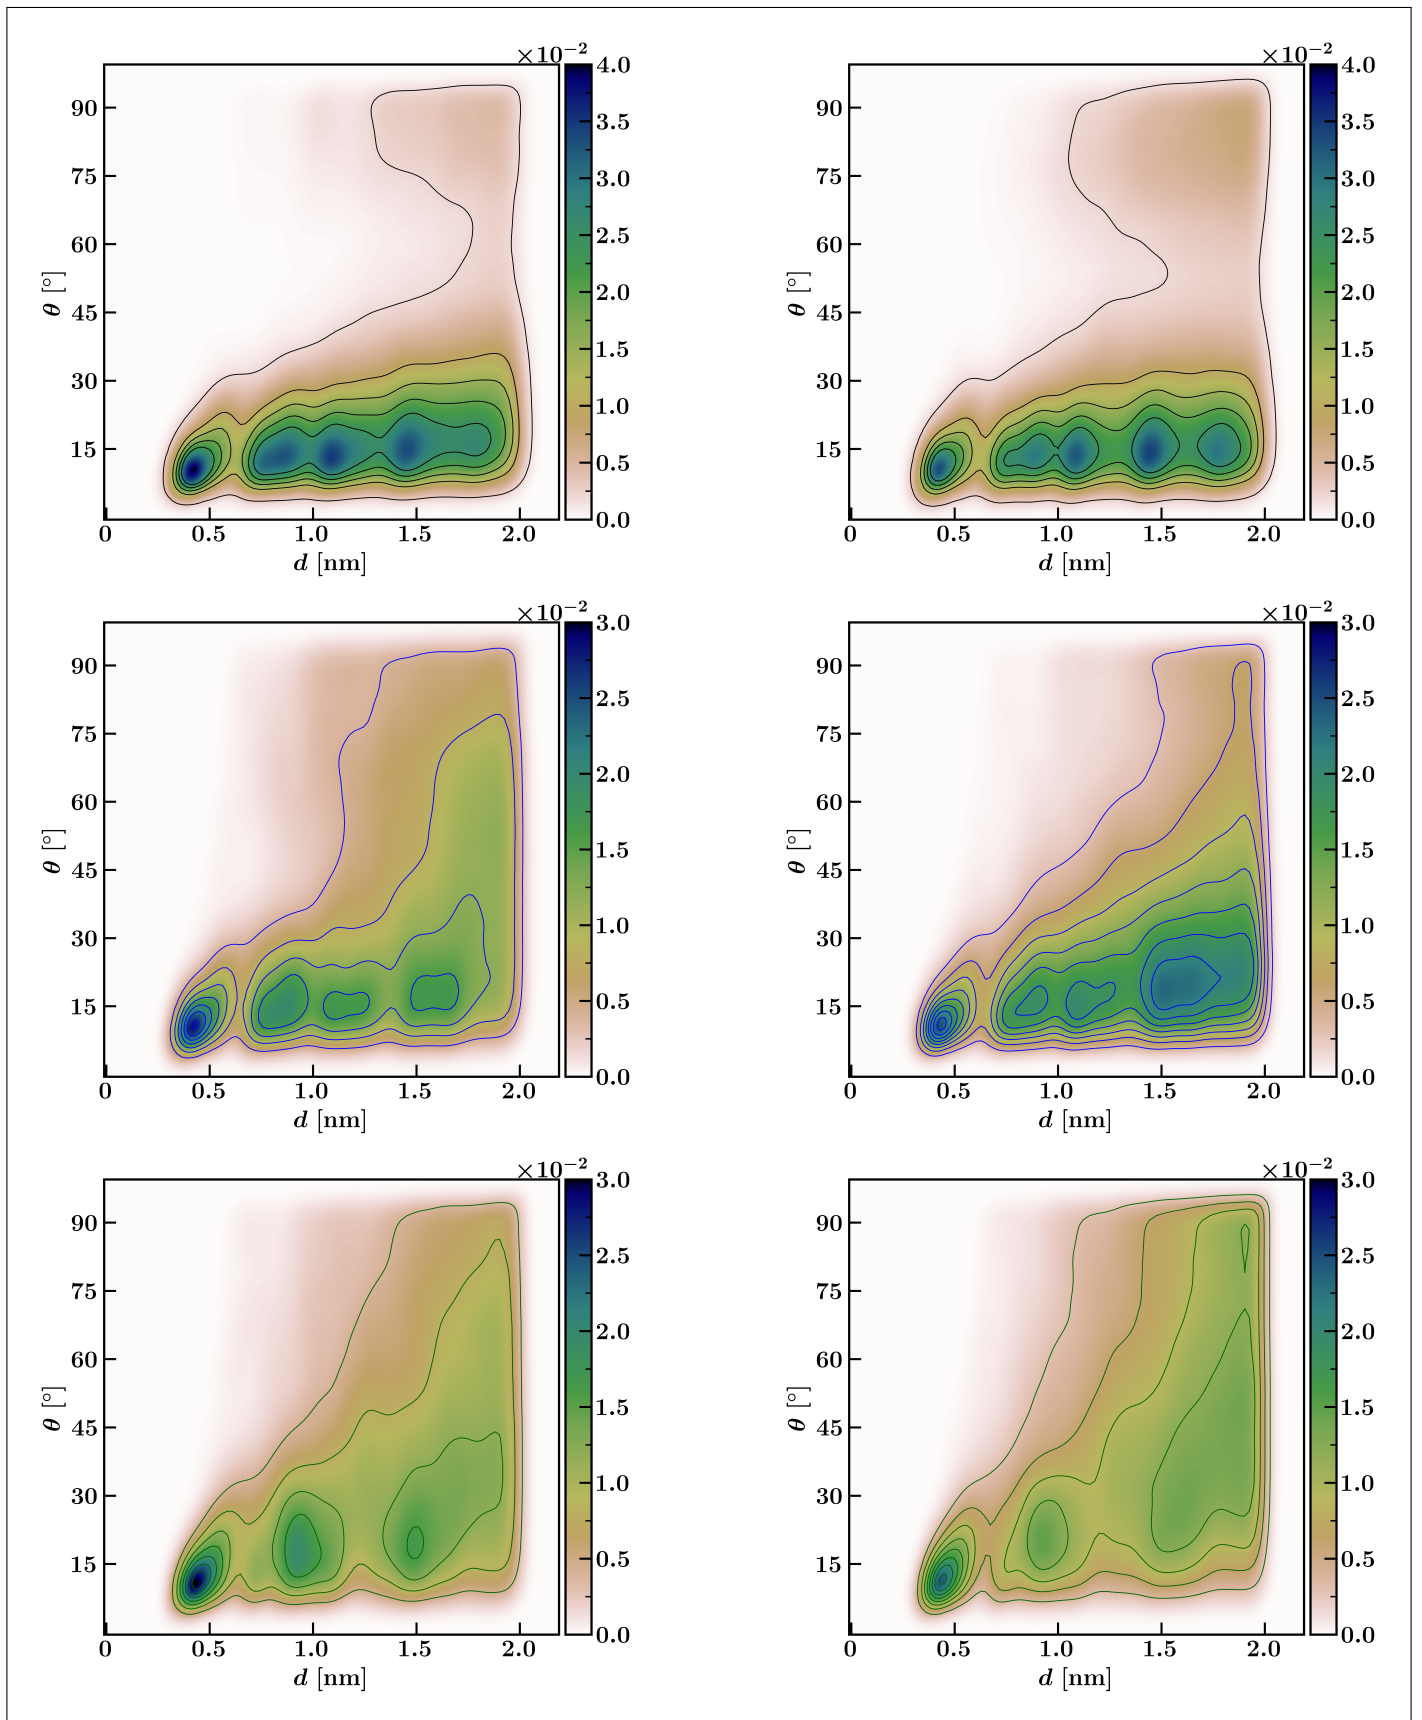

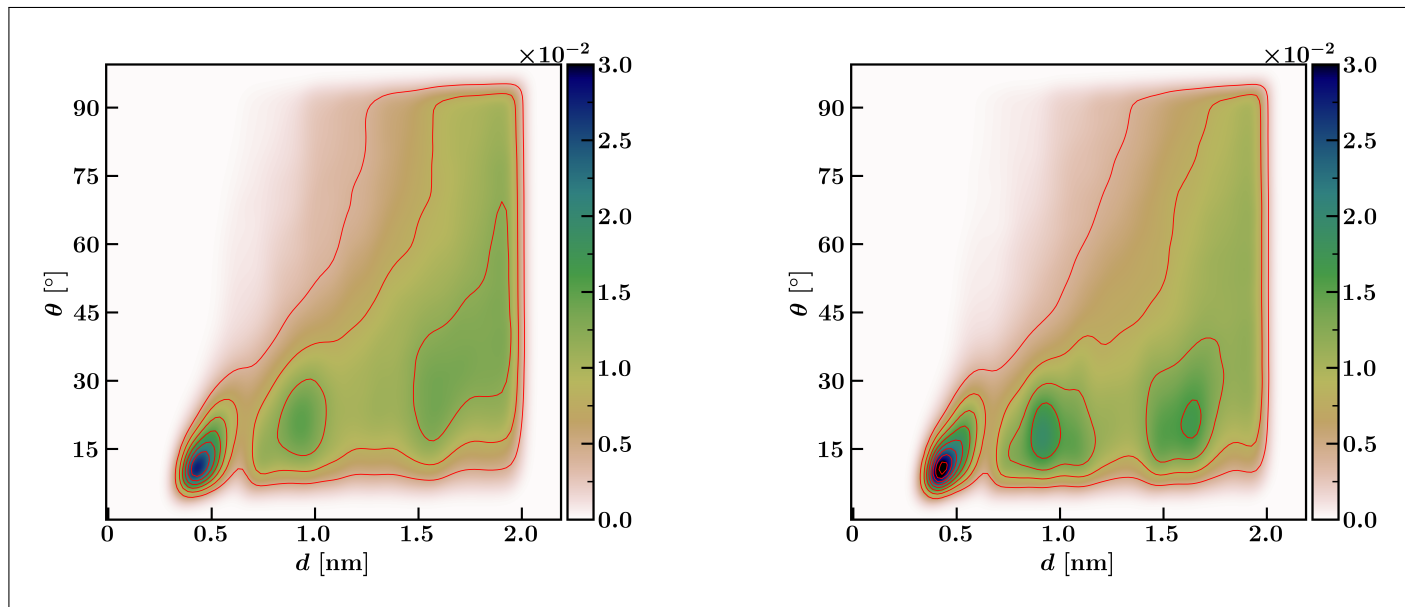

**Fig. S7** The probability (density) map of angle ( $\theta$ ) between stacked aromatic ring (plane) with respect to the distance ( $d$ ) between these rings. First, second, third and fourth rows are representing the results for dimer, tetramer, octamer and hexadecamer, respectively at  $T = 298$  K (left column) and  $T = 323$  K (right column).

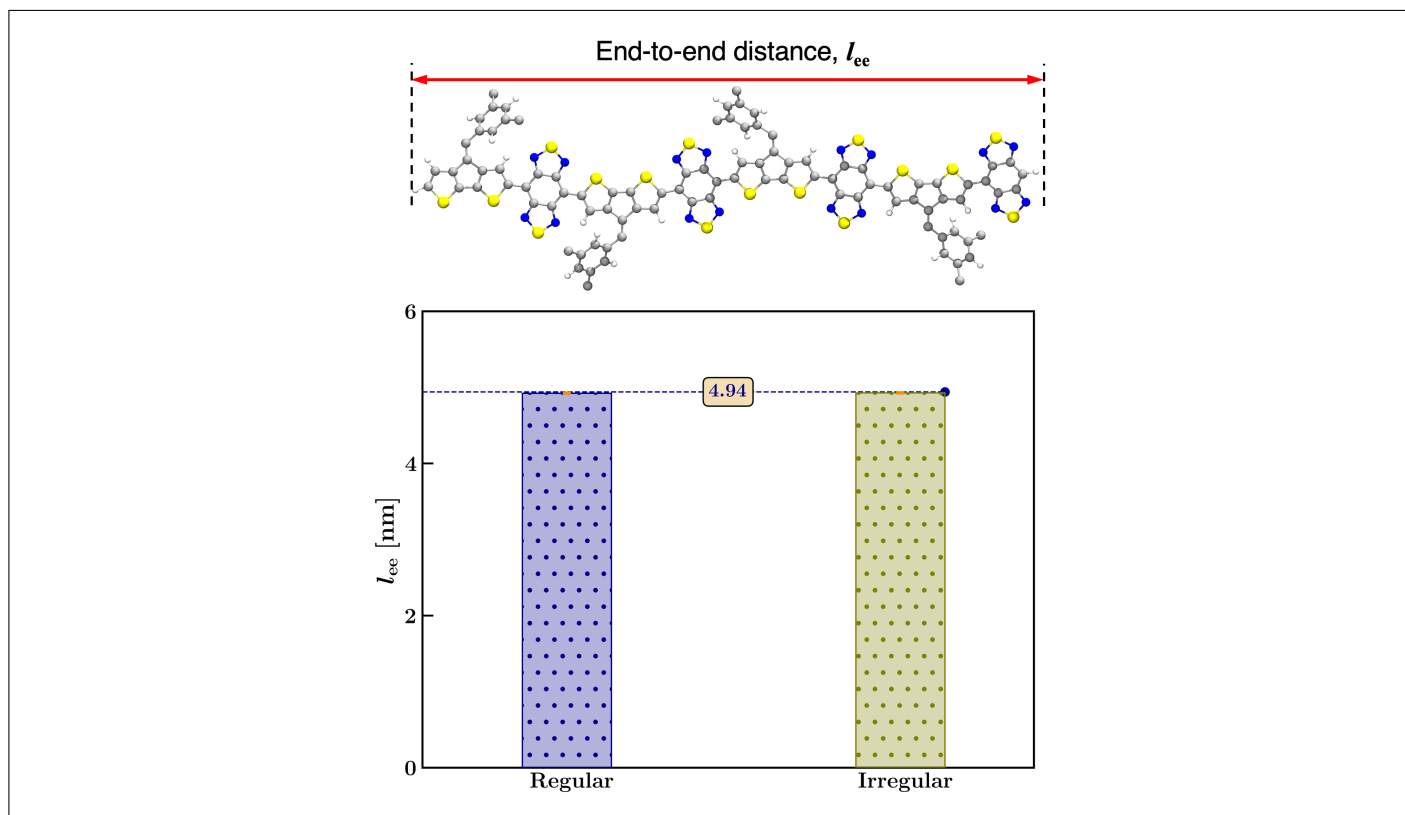

**Fig. S8** End-to-end distance of CPDT-BBT tetramer with regio-regular and regio-irregular lateral groups in chloroform solvent. Isolated single chain elongated length is shown as the horizontal dashed line with the associated value. The tetramer with regio-irregular conformation is shown here.

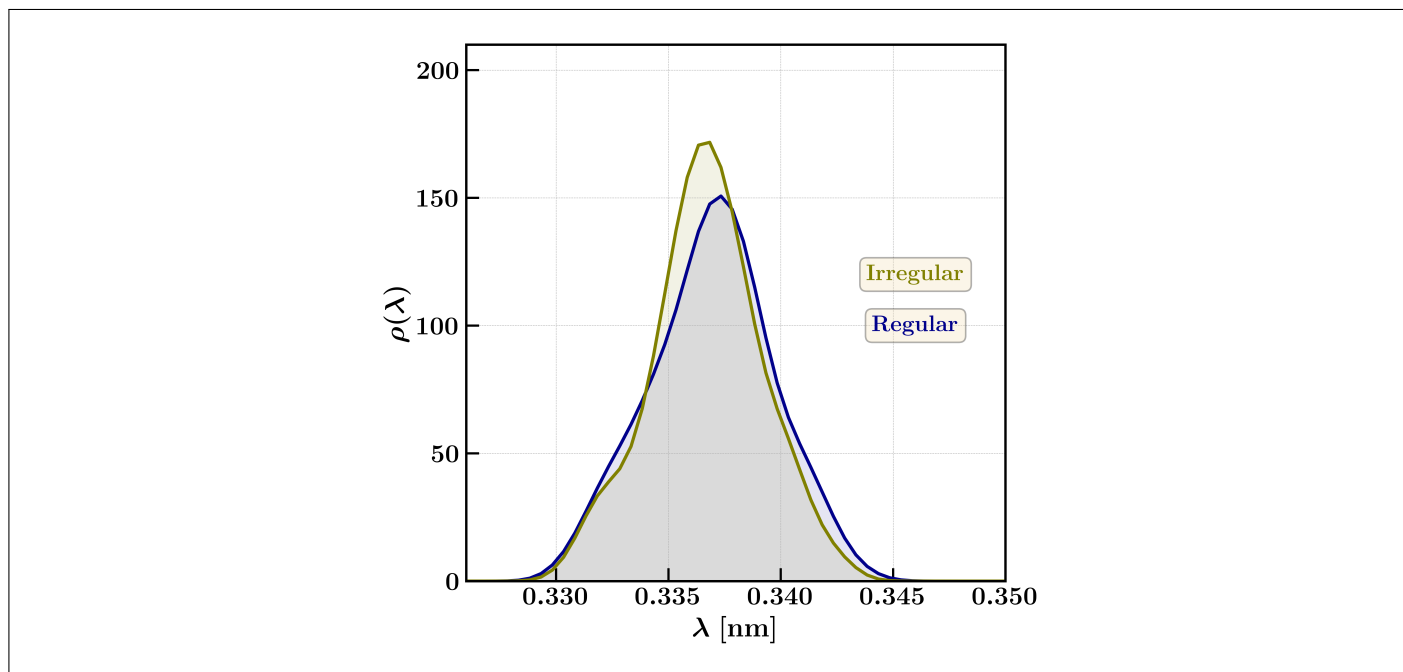

Fig. S9  $\pi$ - $\pi$  Stacking distribution of CPDT-BBT tetramer with regio-regular and regio-irregular lateral groups in chloroform solvent.

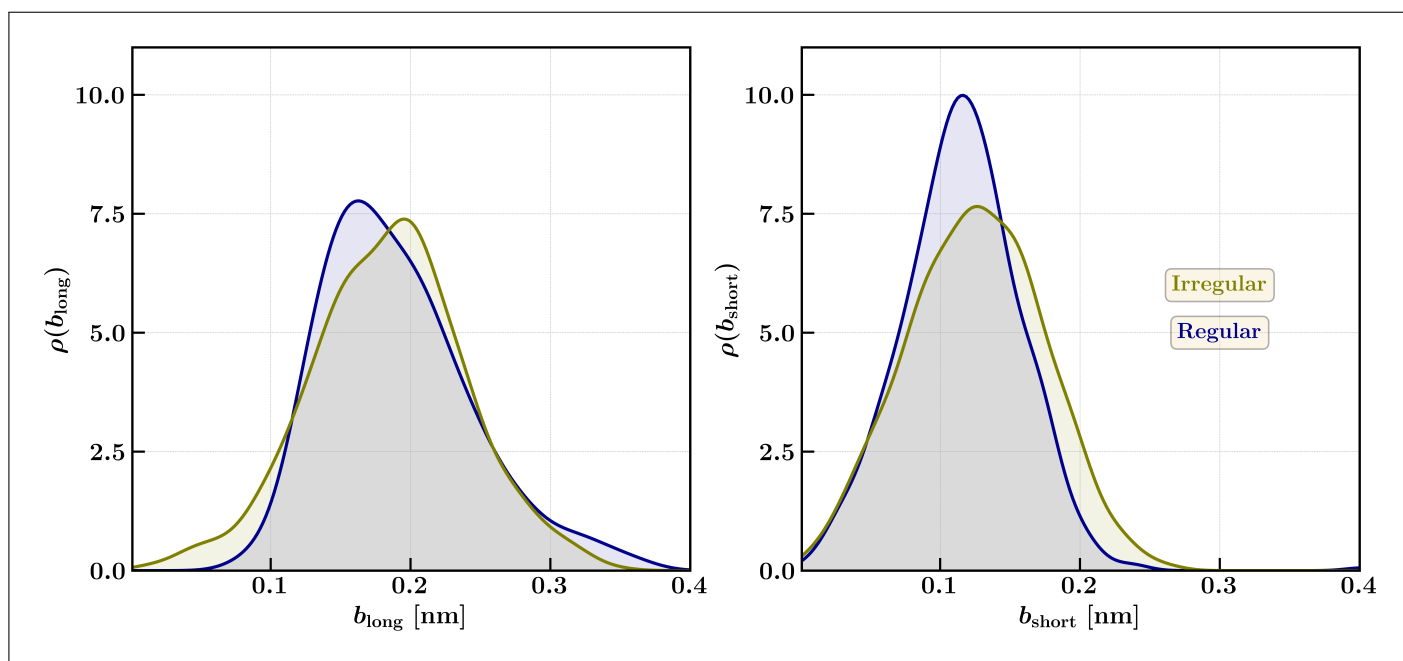

Fig. S10 The distribution of parallel displacement along the long-axis (left) and the short-axis (right) of CPDT-BBT with regio-regular and regio-irregular lateral groups in chloroform solvent.

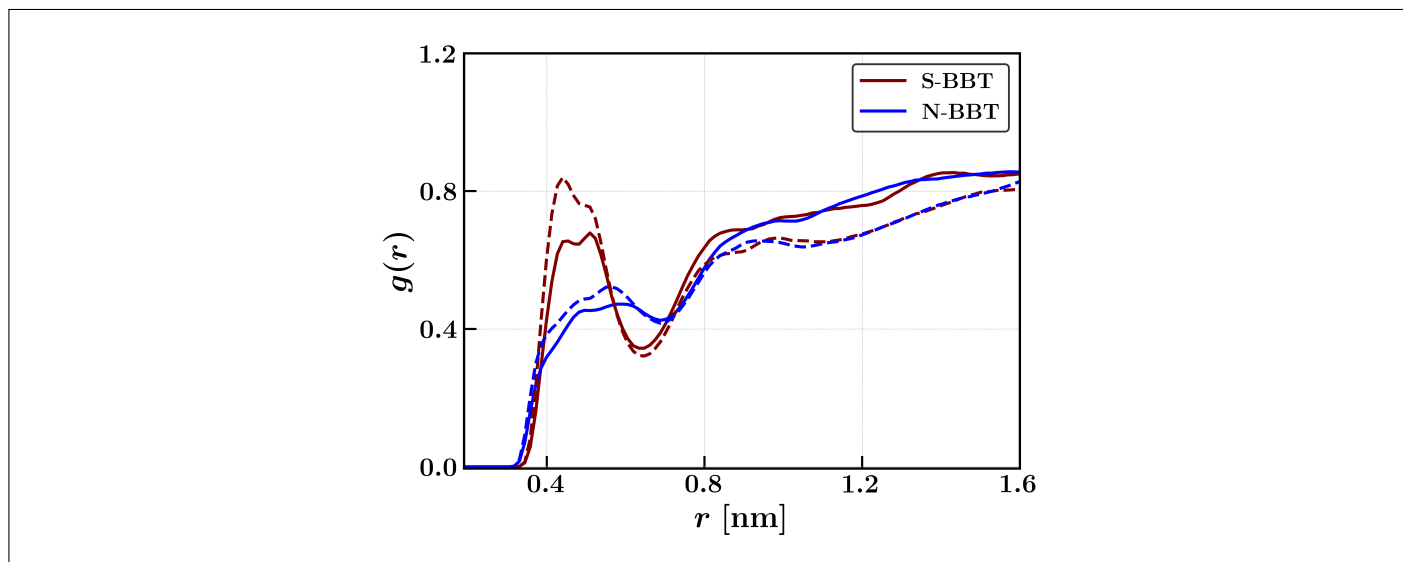

**Fig. S11** Radial distribution function (RDF),  $g(r)$ , of solvent (chloroform) molecules around the regio-irregular CPDT-BBT tetramer. The RDF is plotted as a function of distance ( $r$ ) between C-atoms of chloroform and S-atoms in BBT moieties (maroon), and C-atoms of chloroform and N-atoms in BBT moieties (blue). The solid and dashed lines represent the distribution for lateral groups pointed toward and opposite to the BBT (acceptor) moieties, respectively.

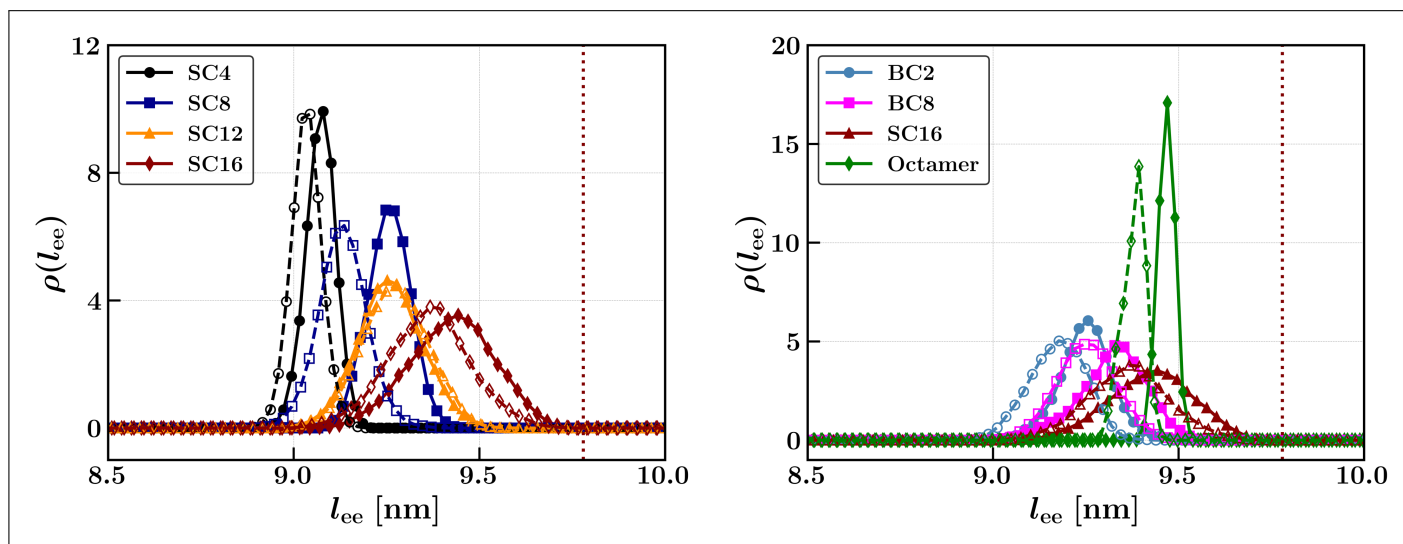

**Fig. S12** End-to-end distance distribution ( $\rho(l_{ee})$ ) of octamer with alkyl side chains of different length (C<sub>4</sub>, C<sub>8</sub>, C<sub>12</sub> and C<sub>16</sub> respectively denoted as SC4, SC8, SC12 and SC16.) (left) and of octamer with C<sub>16</sub> side chains branched at different positions (C<sub>2</sub> and C<sub>8</sub> respectively denoted as BC2 and BC8) (right). The isolated single chain extended length of the octamer is indicated by the dotted vertical lines. Filled and unfilled markers are for  $T = 298$  and  $323$  K, respectively.

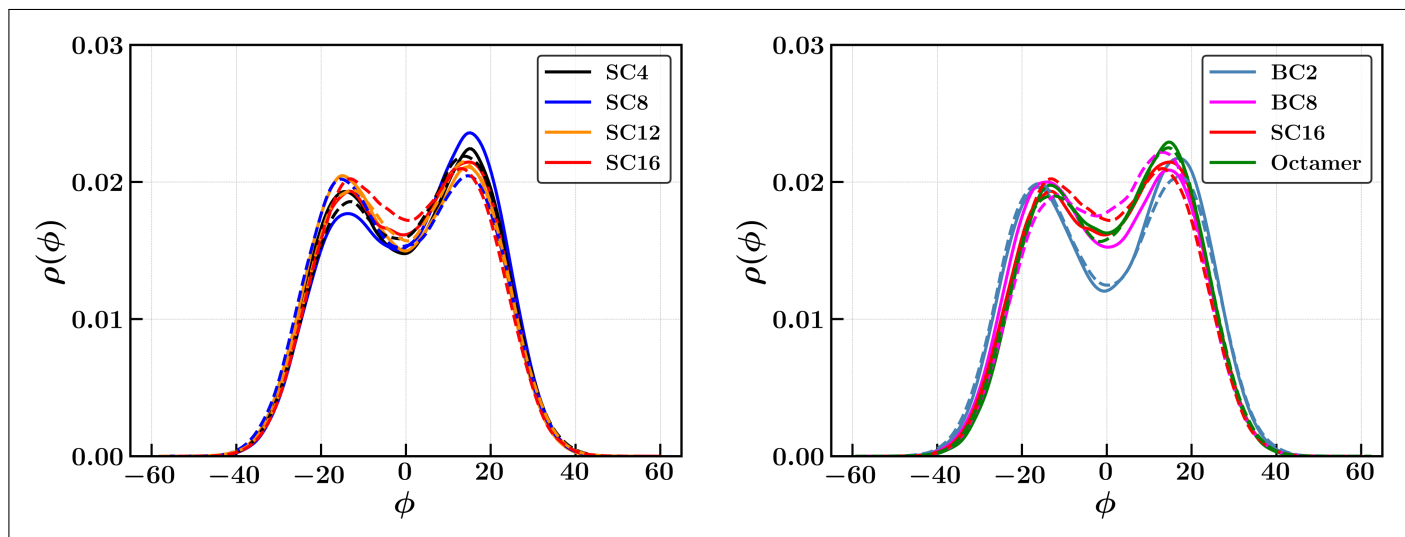

**Fig. S13** Dihedral distribution ( $\rho(\phi)$ ) of donor-acceptor adjoin angle ( $\phi$ ). Effect of linear alkyl side chain on  $\rho(\phi)$  is shown left where side chain length varies from SC4 ( $C_4$ ) to SC16 ( $C_{16}$ ). The effect of branching position (at  $C_2$  (BC2) and  $C_8$  (BC8)) is compared with octamer of CPDT-BBT and CPDT-BBT with linear side chain of equal length  $C_{16}$  (SC16) is shown right. The solid and dashed lines represent the distribution at  $T = 298$  and 323 K, respectively.

**Table S4** Displacement distances of octamer with different side chains at two different temperatures, where  $b_{long}$  and  $b_{short}$  represent long and short displacements, respectively.

| Chain length, $n$   | $T = 298$ K       |                   | $T = 323$ K       |                   |
|---------------------|-------------------|-------------------|-------------------|-------------------|
|                     | $b_{long}$ [Å]    | $b_{short}$ [Å]   | $b_{long}$ [Å]    | $b_{short}$ [Å]   |
| Octamer ( $n = 8$ ) | $2.122 \pm 0.020$ | $0.702 \pm 0.021$ | $1.819 \pm 0.157$ | $1.192 \pm 0.077$ |
| SC4                 | $2.674 \pm 0.354$ | $1.413 \pm 0.279$ | $1.754 \pm 0.034$ | $1.396 \pm 0.033$ |
| SC8                 | $2.310 \pm 0.032$ | $1.079 \pm 0.028$ | $2.288 \pm 0.067$ | $1.539 \pm 0.063$ |
| SC12                | $2.276 \pm 0.051$ | $1.348 \pm 0.060$ | $2.344 \pm 0.059$ | $1.504 \pm 0.054$ |
| SC16                | $2.407 \pm 0.045$ | $1.138 \pm 0.030$ | $2.444 \pm 0.031$ | $1.152 \pm 0.027$ |
| BC8                 | $2.340 \pm 0.055$ | $1.359 \pm 0.044$ | $2.305 \pm 0.032$ | $1.173 \pm 0.034$ |

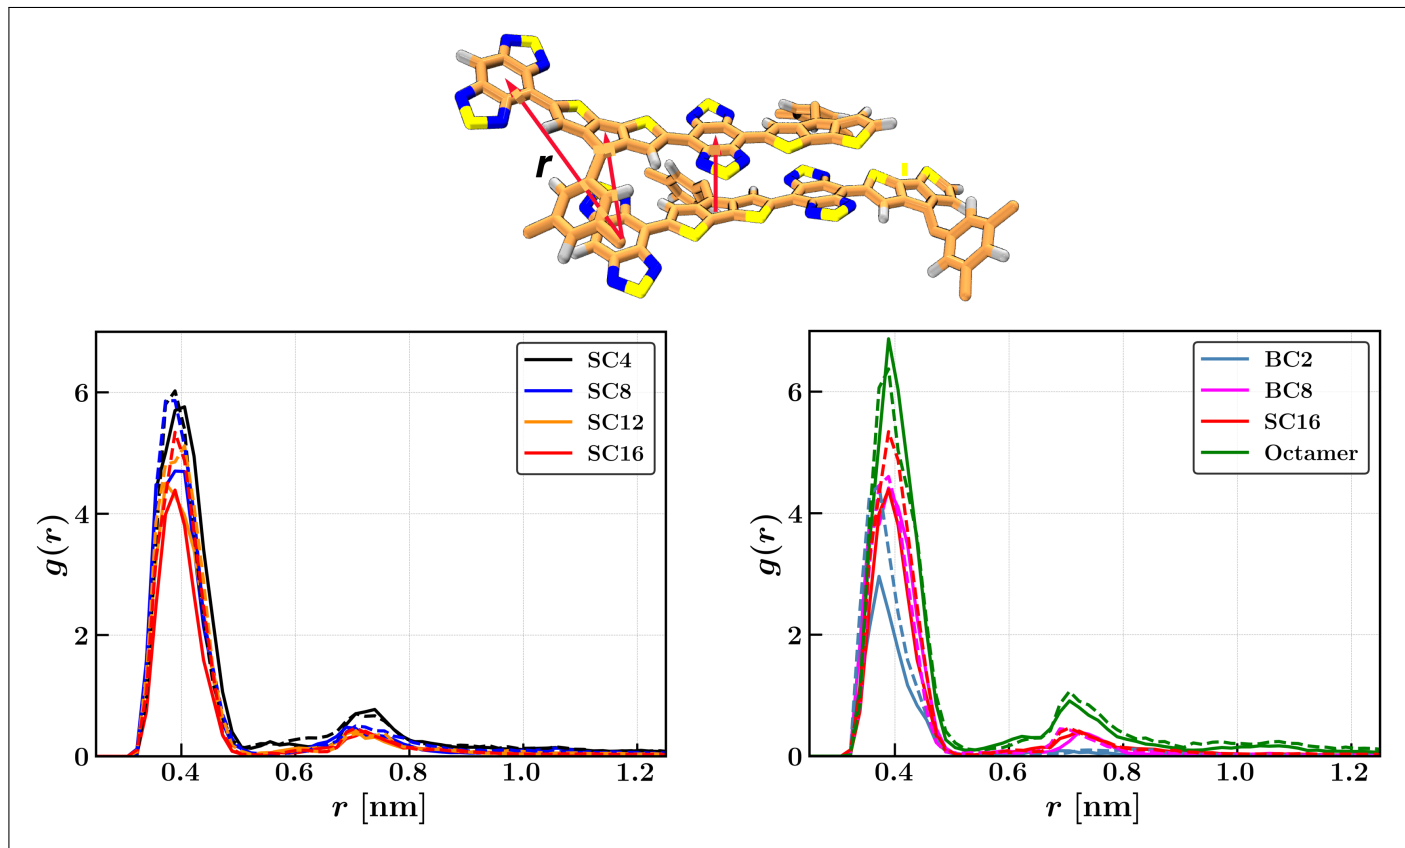

**Fig. S14** Inter-chain RDFs ( $g(r)$ ) for the aromatic ring-center belonging to the CPDT-BBT backbone with different side chains. SC represents the linear alkyl side chain and associated number is for the number of carbon in the chain. BC represents the branched alkyl side chain and associated number indicates the branching position. The solid and dashed lines represent the distribution at  $T = 298$  and  $323$  K, respectively.



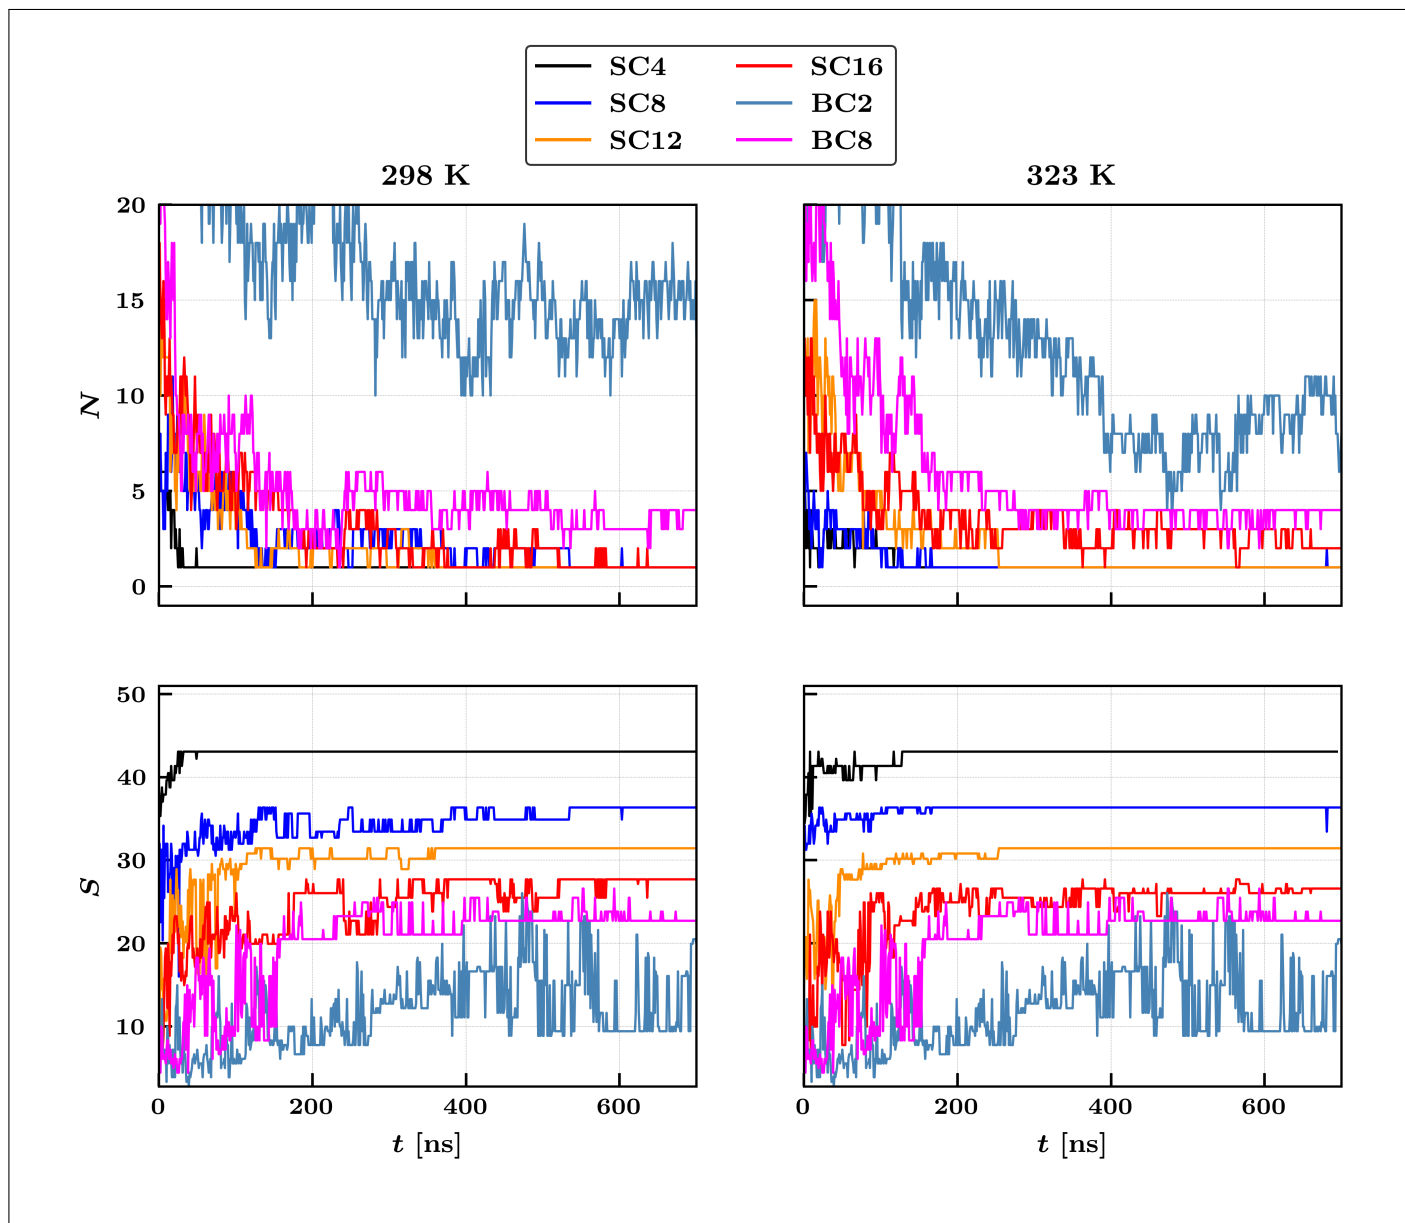

**Fig. S15** The growth of cluster in terms of number of clusters ( $N$ ) and size of the largest cluster ( $S$ ), as the number of oligomers in the cluster, are plotted as the simulation time ( $t$ ) progress. Left column for  $T = 298$  K and right column for  $T = 323$  K. Linear alkyl side chains designated as SC and size is represented as the number of carbons (i.e. C<sub>4</sub> as SC<sub>4</sub>). Branched alkyl side chain designated as BC and the number represents the branching position (i.e. branching at position 2 of alkyl chain as BC<sub>2</sub>).
